# Supplementary material for: Interpreting eddy covariance data from heterogeneous Siberian tundra: land cover-specific methane fluxes and spatial representativeness
Source: Copernicus journal article supplement (doi:10.5194/bg-2018-155), 2018-04-10
Supplement: Supplementary file 1 [file bg-2018-155-supplement.pdf]

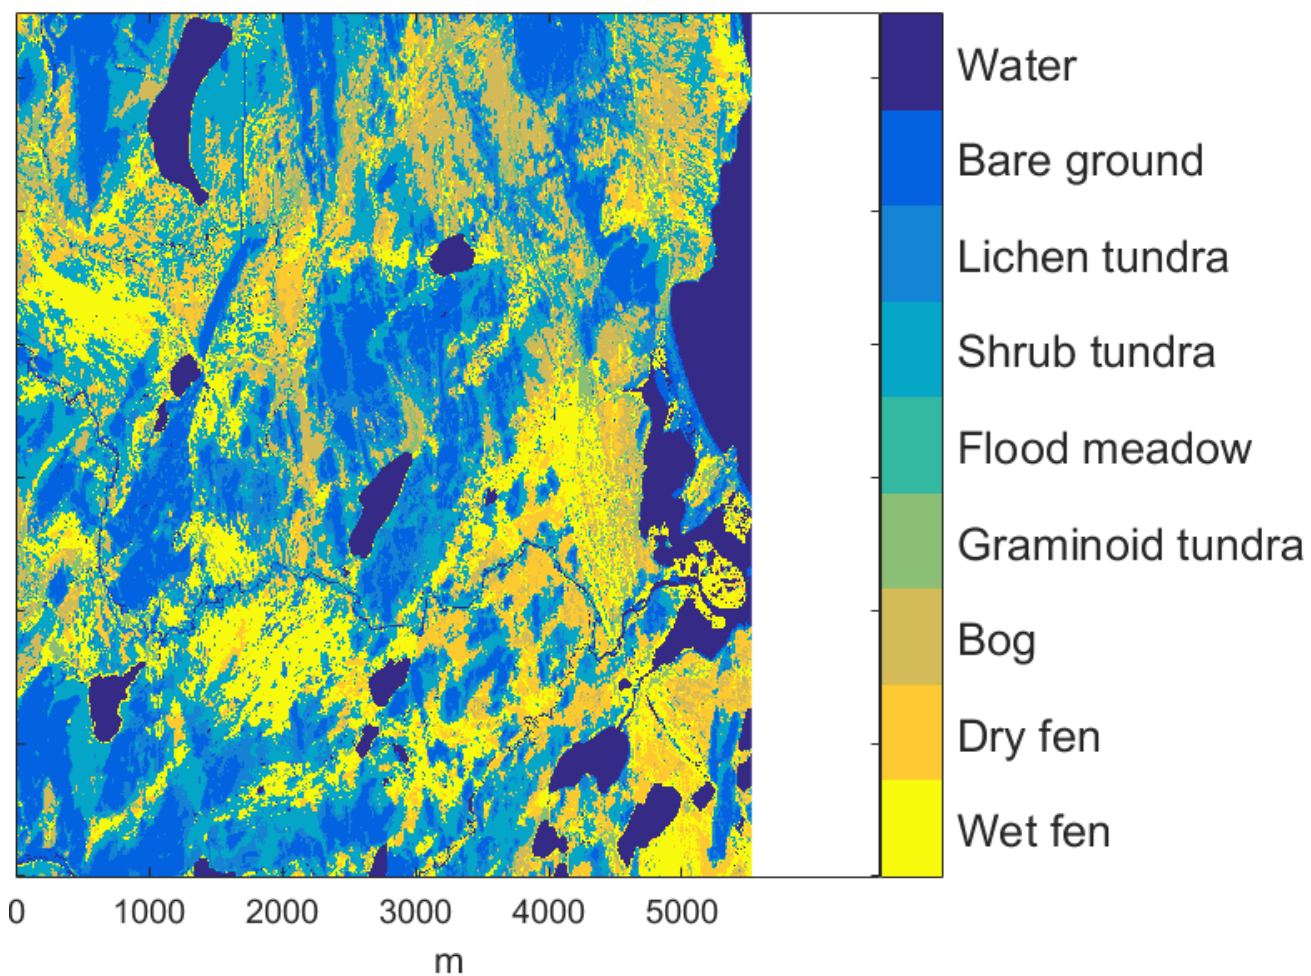

Figure S1. Land cover classification within the regional upscaling area of 35.8 km<sup>2</sup>.

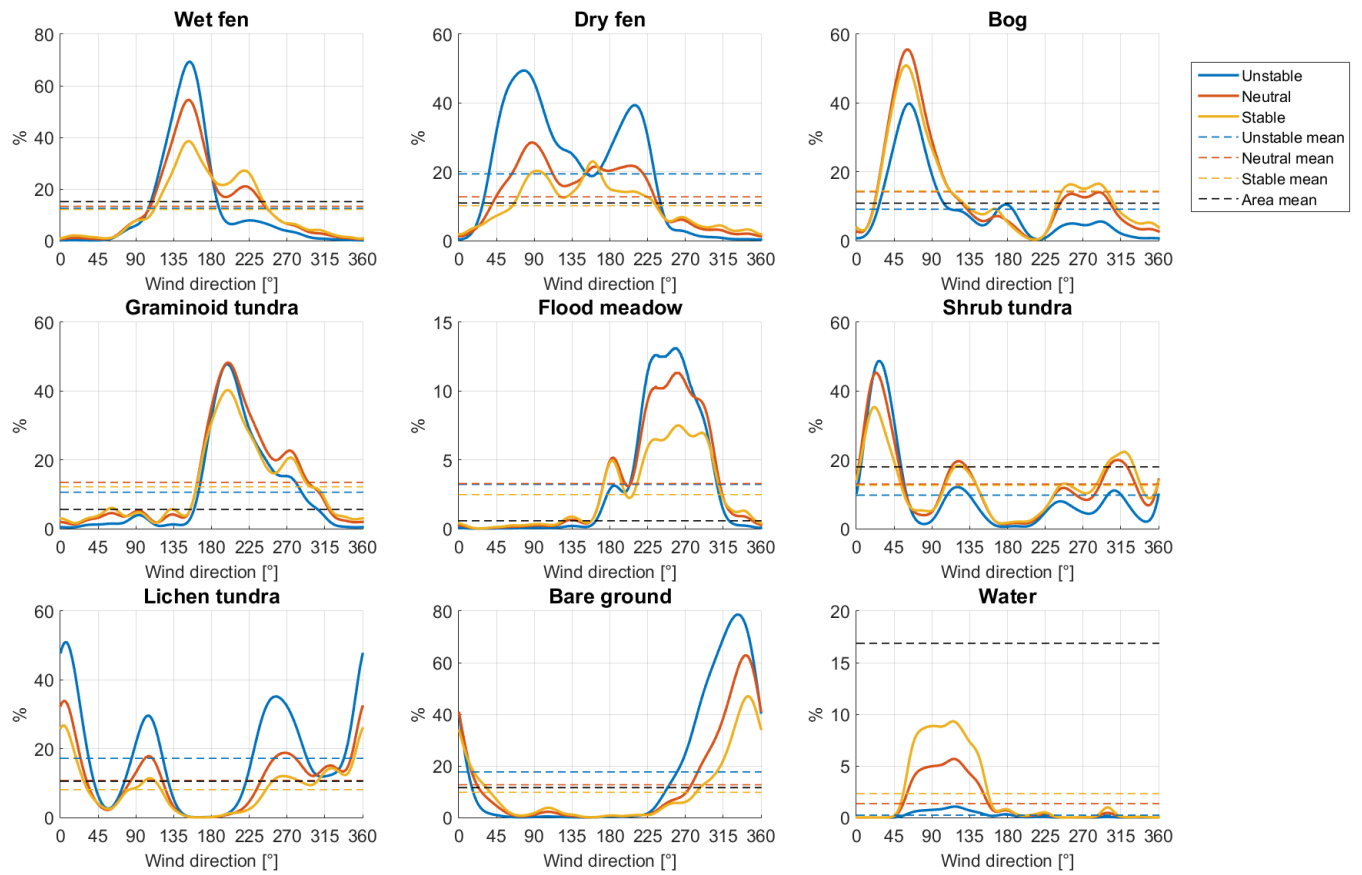

Figure S2. The footprint-weighted and area-averaged proportions of different land cover classes as a function of wind direction for the three flow conditions specified in Table 1.

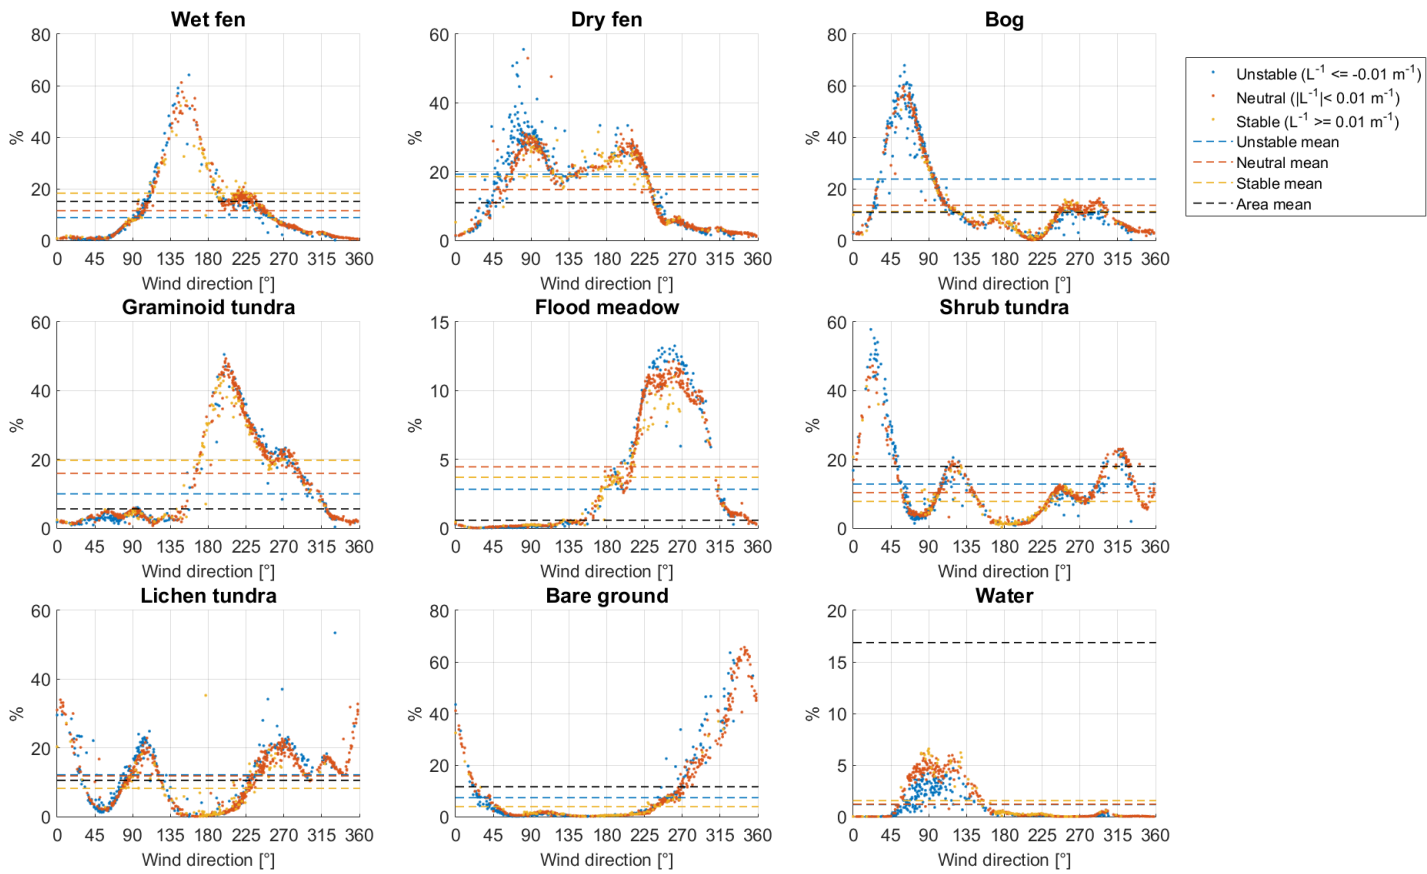

Figure S3. The footprint-weighted and area-averaged proportions of different land cover classes as a function of wind direction during the growing season of 2014.
